1 **TEsorter: lineage-level classification of transposable elements using conserved protein**  
2 **domains**

3 Ren-Gang Zhang<sup>1,\*</sup>, Zhao-Xuan Wang<sup>2</sup>, Shujun Ou<sup>3,\*</sup>, Guang-Yuan Li<sup>1</sup>

4 1. Department of Bioinformatics, Ori (Shandong) Gene Science and Technology Co., Ltd.,  
5 Weifang 261322, China

6 2. Shijiazhuang People's Medical College, Shijiazhuang 050091, China

7 3. Department of Ecology, Evolution, and Organismal Biology (EEOB), Iowa State University,  
8 Ames, IA, 50010, USA

9 \*To whom correspondence should be addressed.

10

11 **Abstract**

12 **Summary:** Transposable elements (TEs) constitute an import part in eukaryotic genomes, but  
13 their classification, especially in the lineage or clade level, is still challenging. For this purpose,  
14 we propose TEsorter, which is based on conserved protein domains of TEs. It is easy-to-use, fast  
15 with multiprocessing, sensitive and precise to classify TEs especially LTR retrotransposons  
16 (LTR-RTs). Its results can also directly reflect phylogenetic relationships and diversities of the  
17 classified LTR-RTs.

18 **Availability:** The code in Python is freely available at <https://github.com/zhangrengang/TEsorter>.

19 **Contact:** [zhangrengang@ori-gene.cn](mailto:zhangrengang@ori-gene.cn) (R.G.Z.) or [oushujun@iastate.edu](mailto:oushujun@iastate.edu) (S.O.)

20

21

22 **1 Introduction**

23 Transposable elements (TEs) constitute the largest portion of most eukaryotic genomes, among  
24 which long terminal repeat retrotransposons (LTR-RTs) are predominant in plant genomes.  
25 Various tools have been developed for identification and classification of TEs or LTR-RTs, such as  
26 RepeatModeler (<http://www.repeatmasker.org/RepeatModeler/>), REPET (Quesneville, *et al.*, 2005)  
27 and LTR\_retriever (Ou and Jiang, 2017). To our knowledge, most of them can only classify TEs  
28 into the superfamily level, leaving the gap for revealing phylogenetic relationships between TEs,  
29 especially the LTR-RT *Copia* and *Gypsy* superfamilies. Previous studies (Llorens, *et al.*, 2009;  
30 Neumann, *et al.*, 2019; Wicker and Keller, 2007) have proposed classifications of LTR-RTs on

31 lineage or clade levels. Particularly, Neumann *et al.* (2019) classified the *Copia* superfamily into  
32 *Ale*, *Alesia*, *Angela*, *Bianca*, *Bryco*, *Lyco*, *Gymco* I–IV, *Ikeros*, *Ivana*, *Osser*, *SIRE*, *TAR* and *Tork*  
33 lineages and the *Gypsy* superfamily into *CRM*, *Chlamyvir*, *Galadriel*, *Tcn1*, *Reina*, *Tekay*, *Athila*,  
34 *Tat* I–III, *Ogre*, *Retand*, *Phygy* and *Selgy* clades. These studies provide protein domain databases  
35 for lineage/clade-level LTR-RT classifications and moreover, the update of REXdb by Neumann *et*  
36 *al.* (2019) also provides classifications for other TEs, such as long interspersed nuclear repeats  
37 (LINEs), terminal inverted repeats (TIRs) and Helitrons. Here we take the opportunity to develop  
38 an automated, easy-to-use classifier, named TESorter, to classify LTR-RTs as well as other TEs  
39 into detailed lineages/clades that reflect their phylogenetic relationships and diversities.

40

## 41 **2 Methods**

42 The TESorter classifier was implemented using hidden Markov model (HMM) profiles obtained  
43 from protein domain databases GyDB (Llorens, *et al.*, 2011) and REXdb (Neumann, *et al.*, 2019).  
44 For REXdb, the viridiplantae v3.0 and metazoa v3 protein sequences were downloaded.  
45 Subsequently, multiple sequence alignments were performed by lineage and domain using  
46 MAFFT (Standley and Katoh, 2013) and HMM profiles were generated with HMMPress (Eddy,  
47 1998).

48 Input DNA sequences were translated in all six frames and the translated sequences were searched  
49 against one of the two databases using HMMScan (Eddy, 1998). Hits with coverage < 20% or  
50 E-value > 1e-3 were discarded. For each domain of one sequence, only the best hit with the  
51 highest score was reserved. The classifications of TE superfamilies (e.g. LTR/*Copia*, LTR/*Gypsy*)  
52 and clades (e.g. *Reina* and *CRM* of *Gypsy*) were based on hits directly. For *Copia* and *Gypsy*  
53 superfamilies, complete elements were identified based on the presence and order of conserved  
54 domains including capsid protein (GAG), aspartic proteinase (AP), integrase (INT), reverse  
55 transcriptase (RT) and RNase H (RH) as described in Wicker *et al.* (2007). The identified domain  
56 sequences were extracted for further phylogenetic analyses.

57 To improve the classification sensitivity, a two-pass strategy was made available. The unclassified  
58 TE sequences were searched against the HMM-classified sequences using BLAST (Altschul, *et al.*,  
59 1990) and then classified with the 80–80–80 rule (Wicker, *et al.*, 2007). This was based on the  
60 sequence-level similarity between autonomous and non-autonomous TEs, in which mutations like

61 frameshifts and domain losses prevent their identification using HMMs. To comply with  
62 alignment uncertainties, this step only classified sequences at the superfamily level.

63

### 64 **3 Results and Discussion**

65 To benchmark the classification performance of TESorter, we selected three non-redundant curated  
66 TE libraries from rice (Ou and Jiang, 2017), maize (Schnable, *et al.*, 2009) and fruit fly (from  
67 Repbase v20.03, Bao, *et al.*, 2015) and compared with four TE classifiers, including the  
68 RepeatClassifier module of RepeatModeler (<http://www.repeatmasker.org/RepeatModeler/>), the  
69 PASTEC module (Hoede, *et al.*, 2014) of REPET, the annotate\_TE module of LTR\_retriever (Ou  
70 and Jiang, 2017) and the online-only LTRclassifier (Monat, *et al.*, 2016). TESorter with REXdb  
71 performed with the highest precision (0.94–1.0) in almost all the TE catalogs (Table 1,  
72 Supplementary Table S1). The sensitivity of TESorter with REXdb was sub-optimal (0.79–0.93) in  
73 classifications of the LTR-RT *Copia* and *Gypsy* superfamilies in plants (Table 1). By searching  
74 against the Pfam database (Punta, *et al.*, 2012), the unclassified LTR-RTs were confirmed to have  
75 lost their main protein domains. Some of these elements can be classified by using similarity to  
76 known elements. For this purpose, we implemented the two-pass strategy in TESorter. However,  
77 due to the divergence of TE sequences, the homology-based approach only improved the  
78 sensitivity marginally (data not shown). As a result, a lower sensitivity was expected due to the  
79 rich of non-autonomous elements, including TIRs and Helitrons (Supplementary Table S1). In  
80 contrast, for autonomous TIR and Helitron elements, TESorter performed much higher sensitivity  
81 (0.84–0.89) (Supplementary Table S1). TESorter performed better with REXdb than with GyDB in  
82 plants (Table 1) due to the systematic collection of plant LTR-RTs by Neumann *et al.* (2019). Both  
83 databases showed low sensitivity (~0.5) in fly LTR-RTs classification (Supplementary Table S1),  
84 which might be a limitation of the domain-based approach on consensus sequences, as discussed  
85 by Monat, *et al.* (2016).

86

87 RepeatClassifier had the best sensitivity in most cases (Table 1, Supplementary Table S1), which  
88 was benefited from Repbase that has collected TE sequences from the three species we  
89 benchmarked. PASTEC in the REPET pipeline also uses Repbase for classification. However, it  
90 only provided confident classifications at the order level (Supplementary Table S1). LTRclassifier

91 and LTR\_retriever used a set of selected Pfam domains for LTR-RT classifications. However, the  
92 selected Pfam domains aim for broad representation instead of clade-specific classification.  
93 TESorter generally exhibited higher sensitivity and precision comparing to these two methods  
94 (Table 1, Supplementary Table S1).

95

96 TESorter assigned 76–92% of LTR *Copia* or *Gypsy* elements into diverse clades in plants (Table 1).  
97 We performed phylogenetic analyses to evaluate the precision of these clade-level assignments.  
98 Briefly, protein domain sequences were extracted using TESorter and aligned with MAFFT  
99 (Standley and Katoh, 2013), and the phylogenetic trees were reconstructed using IQ-TREE  
100 (Nguyen, *et al.*, 2015). Using RT domains as an example, the clade-level classification of TESorter  
101 was highly consistent (99.06%) with the phylogeny (Supplementary Fig. S1a) and also consistent  
102 with the previous report (Neumann, *et al.*, 2019). Similar high consistencies were observed on  
103 other domains' classification (Supplementary Fig. S1b–d). These results revealed high-confidence  
104 classifications at the clade level by TESorter.

105

106 The TESorter package was implemented in Python and was accelerated using multiprocessing  
107 (Table 1).

108

109

110 **Supplementary Fig. S1. Consistency between classifications of TEs and phylogenetic**  
111 **relationships based on RT (a), RH (b), INT (c) and concatenated RT–RH–INT (d) domains**  
112 **in rice.** Conflicts were highlighted by black circle nodes. The tree was un-rooted. Branches were  
113 colored based on TESorter classifications.

114

115 **Supplementary Table S1. Performances with different TE catalogs.**

116 **Table 1. Comparison of the performance of difference classifiers.**

| Library | Classifier       | LTR/ <i>Copia</i> |              |                     | LTR/ <i>Gypsy</i> |              |        | all LTR-RTs  |              | other TEs    |              | CPU time<br>(hour) |
|---------|------------------|-------------------|--------------|---------------------|-------------------|--------------|--------|--------------|--------------|--------------|--------------|--------------------|
|         |                  | sensitivity       | precision    | clades <sup>†</sup> | sensitivity       | precision    | clades | sensitivity  | precision    | sensitivity  | precision    |                    |
| Rice*   | TEsorter (REXdb) | <b>0.893</b>      | <b>1.000</b> | 89.3%               | 0.786             | <b>1.000</b> | 78.6%  | 0.782        | <b>0.994</b> | 0.160        | <b>1.000</b> | 0.09               |
|         | TEsorter (GyDB)  | 0.843             | 0.993        | 83.0%               | 0.768             | 0.989        | 76.8%  | 0.765        | <b>0.994</b> | NA           | NA           | 0.15               |
|         | RepeatModeler    | 0.881             | 0.959        | NA                  | <b>0.906</b>      | 0.919        | NA     | <b>0.907</b> | 0.951        | <b>0.808</b> | 0.997        | 15.1               |
|         | LTR_retriever    | 0.868             | <b>1.000</b> | NA                  | 0.830             | 0.979        | NA     | 0.814        | 0.991        | NA           | NA           | <b>0.01</b>        |
|         | LTRclassifier**  | 0.824             | <b>1.000</b> | NA                  | 0.576             | 0.679        | NA     | 0.645        | 0.822        | NA           | NA           | 1.0                |
| Maize   | TEsorter (REXdb) | 0.919             | 0.966        | 91.9%               | 0.930             | <b>1.000</b> | 91.8%  | 0.793        | 0.998        | 0.329        | <b>0.997</b> | 0.1                |
|         | TEsorter (GyDB)  | 0.914             | <b>0.977</b> | 89.7%               | 0.922             | 0.991        | 90.6%  | 0.770        | 0.998        | NA           | NA           | 0.12               |
|         | RepeatModeler    | <b>0.957</b>      | 0.823        | NA                  | <b>0.988</b>      | 0.675        | NA     | <b>0.925</b> | 0.967        | <b>0.541</b> | 0.968        | 14.4               |
|         | LTR_retriever    | 0.892             | 0.859        | NA                  | 0.918             | 0.878        | NA     | 0.757        | <b>1.000</b> | NA           | NA           | <b>0.01</b>        |
|         | LTRclassifier    | 0.789             | 0.913        | NA                  | 0.664             | 0.818        | NA     | 0.547        | 0.916        | NA           | NA           | 1.2                |

117 \*For LTR-RTs in the rice library, only the internal sequences were included. \*\*Only classifications based on Pfam were received from the web server of  
 118 LTRclassifier. † Percentage of elements that were assigned into diverse clades. Sensitivity = (true positive) / (true positive + false negative) and precision = (true  
 119 positive) / (true positive + false positive). NA, not available. For more details, see Supplementary Table S1.

120 **Acknowledgments**

121 We thank Dr. Neumann Pavel for the notification of the release of REXdb and Dr. Jia-Hui Chen  
122 for suggestions to analyze RT domains of LTR-RTs and LINEs.

123 *Conflict of Interest: none declared.*

124

125 **References**

- 126 Altschul, S.F. *et al.* (1990) Basic local alignment search tool. *J. Mol. Biol.*, **215**, 403–410.
- 127 Bao, W. *et al.* (2015) Repbase Update, a database of repetitive elements in eukaryotic genomes.  
128 *Mobile DNA*, **6**, 11.
- 129 Eddy, S.R. (1998) Profile hidden Markov models. *Bioinformatics*, **14**, 755–763.
- 130 Hoede, C. *et al.* (2014) PASTEC: an automatic transposable element classification tool. *PLoS*  
131 *ONE*, **9**, e91929.
- 132 Llorens, C. *et al.* (2009) Network dynamics of eukaryotic LTR retroelements beyond phylogenetic  
133 trees. *Biol. Direct*, **4**, 41.
- 134 Llorens, C. *et al.* (2011) The *Gypsy* Database (GyDB) of mobile genetic elements: release 2.0.  
135 *Nucleic Acids Res.*, **39**, 70–74.
- 136 Monat, C. *et al.* (2016) LTRclassifier: a website for fast structural LTR retrotransposons  
137 classification in plants. *Mob. Genet. Elem.*, **6**, e1241050.
- 138 Neumann, P. *et al.* (2019) Systematic survey of plant LTR-retrotransposons elucidates  
139 phylogenetic relationships of their polyprotein domains and provides a reference for element  
140 classification. *Mobile DNA*, **10**, 1.
- 141 Nguyen, L.T. *et al.* (2015) IQ-TREE: a fast and effective stochastic algorithm for estimating  
142 maximum-likelihood phylogenies. *Mol. Biol. Evol.*, **32**, 268–274.
- 143 Ou, S. and Jiang, N. (2017) LTR\_retriever: a highly accurate and sensitive program for  
144 identification of long terminal-repeat retrotransposons. *Plant Physiol.*, **176**, 1310–2017.
- 145 Punta, M. *et al.* (2012) The Pfam protein families database. *Nucleic Acids Res.*, **40**, D290–D301.
- 146 Quesneville, H. *et al.* (2005) Combined evidence annotation of transposable elements in genome  
147 sequences. *PLoS Comput. Biol.*, **1**, e22.
- 148 Schnable, P.S. *et al.* (2009) The B73 maize genome: complexity, diversity, and dynamics. *Science*,  
149 **326**, 1112–1115.

- 150 Standley, D.M. and Katoh, K. (2013) MAFFT multiple sequence alignment software version 7:  
151 improvements in performance and usability. *Mol. Biol. Evol.*, **30**, 772–780.
- 152 Wicker, T. *et al.* (2007) A unified classification system for eukaryotic transposable elements. *Nat.*  
153 *Rev. Genet.*, **10**, 973–982.
- 154 Wicker, T. and Keller, B. (2007) Genome-wide comparative analysis of *copia* retrotransposons in  
155 Triticeae, rice, and *Arabidopsis* reveals conserved ancient evolutionary lineages and distinct  
156 dynamics of individual *copia* families. *Genome Res.*, **17**, 1072.
